# Supplementary material for: NAD+ Acts as a Protective Factor in Cellular Stress Response to DNA Alkylating Agents
Source: MDPI journal article supplement (doi:10.3390/cells12192396), 2023-10-02
Supplement: s1 [file s1]

## **Supplementary information for**

### **NAD<sup>+</sup> acts as a protective factor in cellular stress response to DNA alkylating agents**

Joanna Ruszkiewicz<sup>1</sup>\*, Ylea Papatheodorou<sup>1</sup>, Nathalie Jäck<sup>1</sup>, Jasmin Melzig<sup>1</sup>, Franziska Eble<sup>1</sup>, Annika Pirker<sup>1</sup>, Marius Thomann<sup>1</sup>, Andreas Haberer<sup>1</sup>, Simone Rothmiller<sup>2</sup>, Alexander Bürkle<sup>1</sup>\* and Aswin Mangerich<sup>1,3</sup>\*

<sup>1</sup> Molecular Toxicology Group, Department of Biology, University of Konstanz, 78457, Konstanz, Germany

<sup>2</sup> Bundeswehr Institute of Pharmacology and Toxicology, 80937, Munich, Germany

<sup>3</sup> Nutritional Toxicology, Institute Nutritional Science, University of Potsdam, 14469 Potsdam, Germany

**\*Correspondence:** [joanna.ruszkiewicz@uni-konstanz.de](mailto:joanna.ruszkiewicz@uni-konstanz.de), [alexander.buerkle@uni-konstanz.de](mailto:alexander.buerkle@uni-konstanz.de), [mangerich@uni-potsdam.de](mailto:mangerich@uni-potsdam.de)

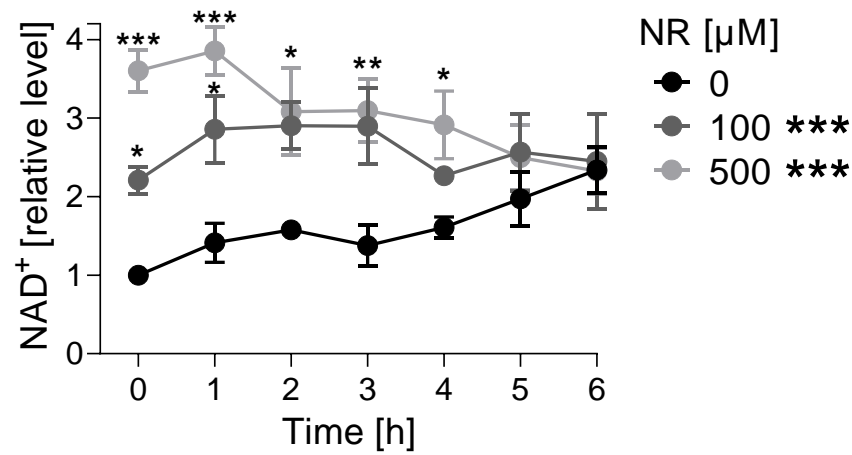

**Figure S1: NR-dependent cellular NAD<sup>+</sup> increase.** HaCaT cells were exposed to NR for 3 h, next the growth medium was exchanged for fresh medium without NR, and cells were harvested at indicated time points. Cellular NAD<sup>+</sup> levels were measured via enzymatic cycling assay and data were normalized to the control “0 μM” at 0 h. The results were expressed as mean ±SEM and analyzed by two-way ANOVA with Tukey's multiple comparisons test (n=4). \*P<0.05, \*\* P<0.01, \*\*\* P<0.001.

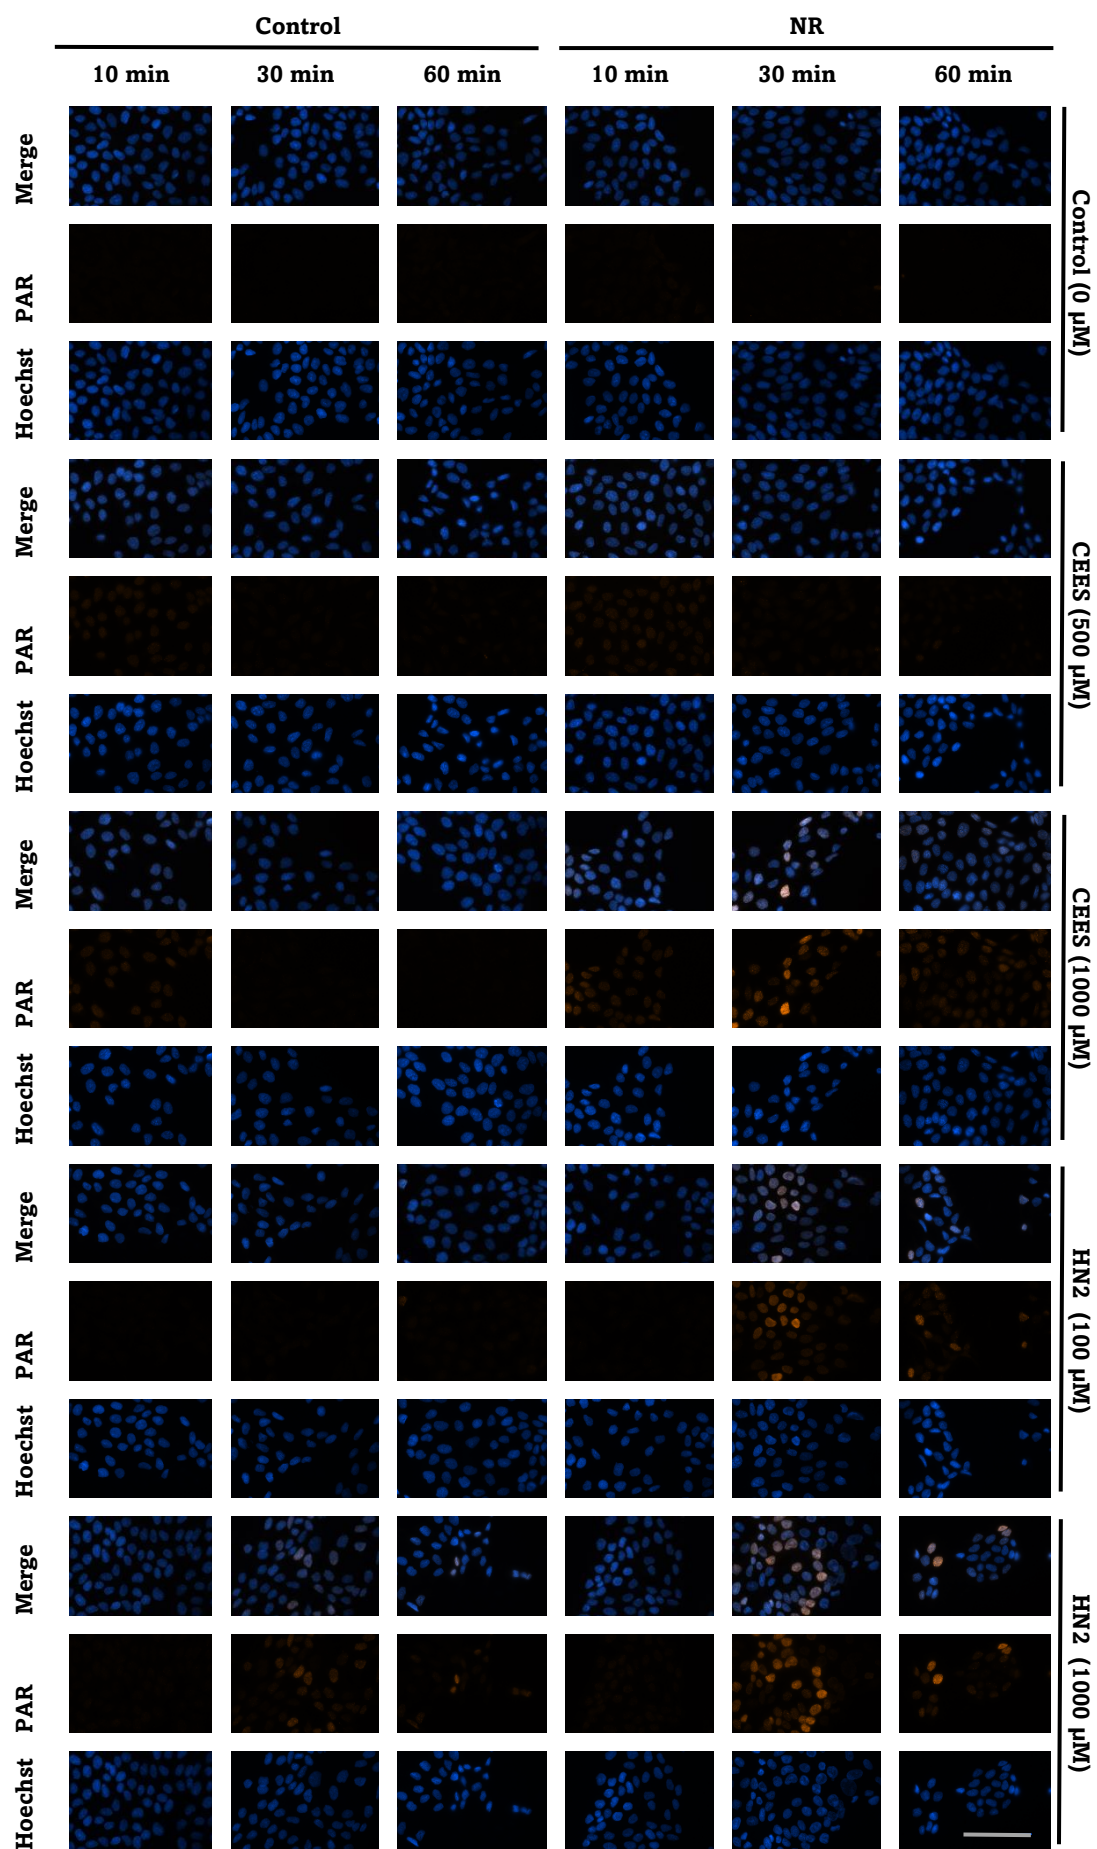

**Figure S2: NR elevates PAR levels during genotoxic stress.** HaCaT cells were supplemented with 100  $\mu$ M NR for 3 h and further treated with CEES or HN2 for 10, 30, or 60 min in PBS; “0 mM” refers to solvent control. At the end of each time point cells were fixed with ice-cold methanol, stained with anti-PAR antibody (10H) and DNA dye (Hoechst) and the signal was captured using an epifluorescence microscope. Scale bar indicates 100  $\mu$ m.

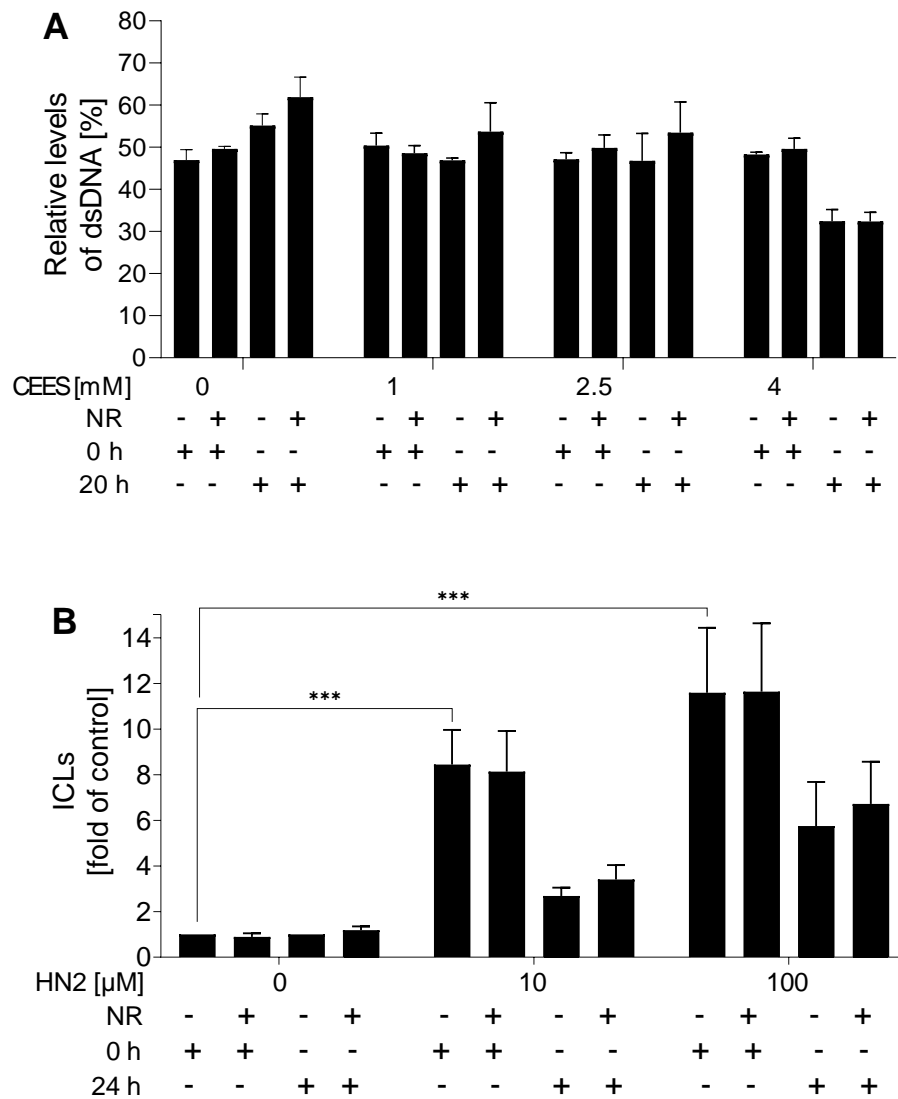

**Figure S3: NR does not affect the formation and repair of DNA damage induced by alkylating agents.** HaCaT cells were supplemented with 100  $\mu$ M NR for 3 h and further treated with CEES (**A**, n=3), or HN2 (**B**, n=4) for 30 min in PBS. “0” refers to solvent control. Next cells were washed and incubated with fresh growth medium  $\pm$ 100  $\mu$ M NR for 20 h (**A**) or 24 h (**B**), or harvested immediately (0 h). Induction of DNA strand breaks, which is inversely proportional to the relative levels of double-stranded DNA (dsDNA) remaining after alkaline unwinding, by CEES was measured via fluorimetric detection of alkaline DNA unwinding (FADU) assay (**A**), whereas induction of inter-strand crosslinks (ICLs) by HN2 was measured with reversed automated fluorimetric detection of alkaline DNA unwinding (rFADU) assay. Results were expressed as mean  $\pm$ SEM and analyzed by two-way ANOVA with Tukey’s multiple comparisons test. \*\*\*  $P < 0.001$ .

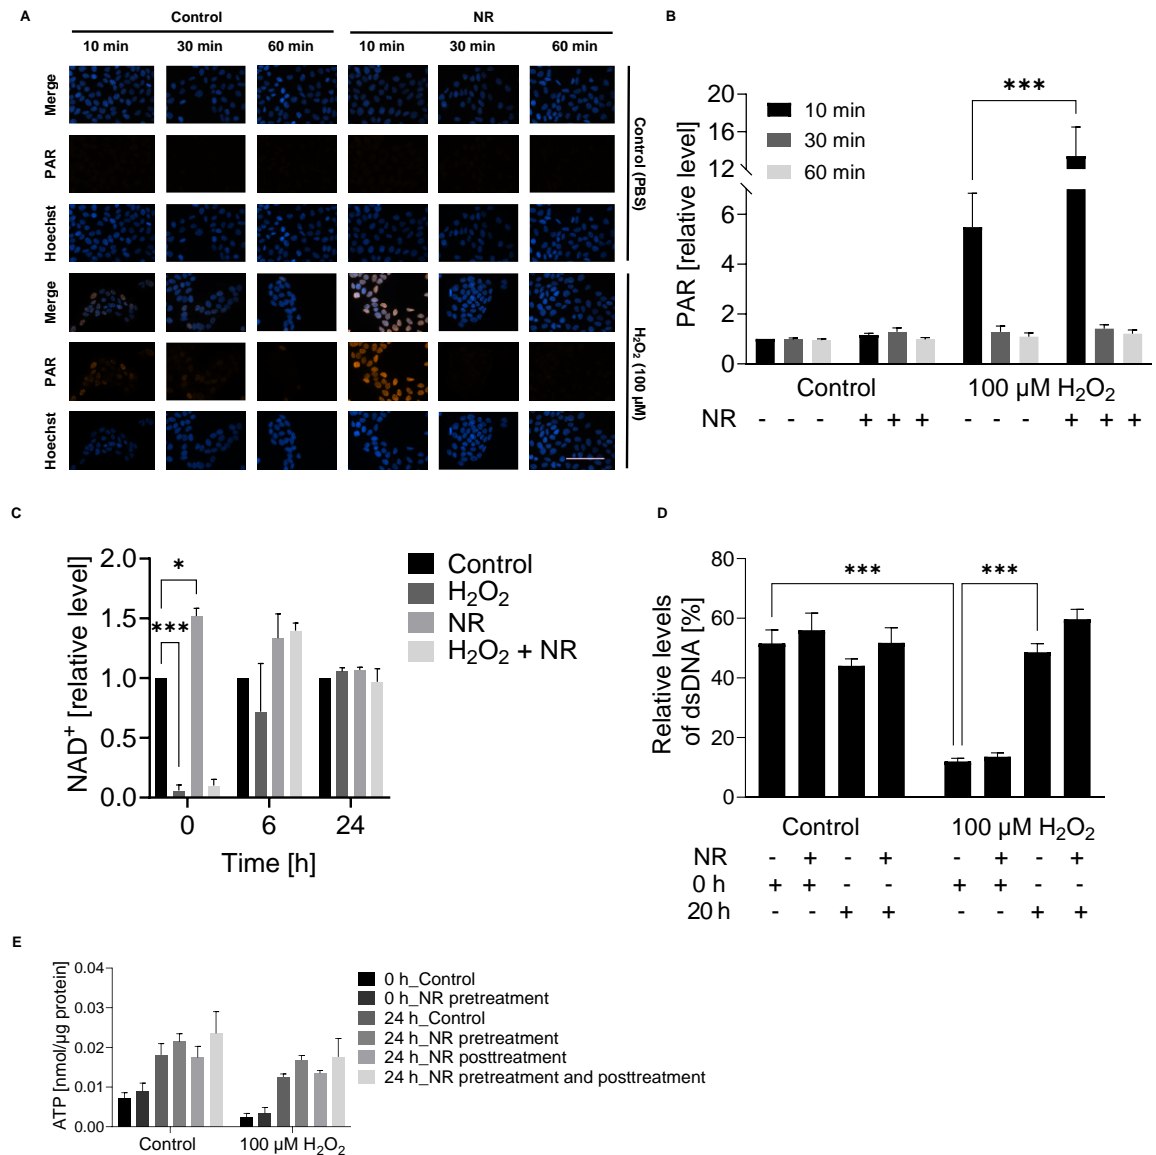

**Figure S4: Effects of NR on H<sub>2</sub>O<sub>2</sub> response in HaCaT.** **A:** HaCaT cells were supplemented with 100 μM NR for 3 h and further treated with 100 μM H<sub>2</sub>O<sub>2</sub> for 10, 30, or 60 min in PBS (“Control”). At the end of each treatment cells were fixed with ice-cold methanol, stained with anti-PAR antibody (10H) and DNA dye (Hoechst), and the signal was captured using an epifluorescence microscope. Scale bars indicate 100 μm. **B:** Images were automatically analyzed using KNIME software, and results were normalized to “Control” (10 min) (n=3). **C:** HaCaT cells were supplemented with 100 μM NR for 3 h and further treated with 100 μM H<sub>2</sub>O<sub>2</sub> for 10 min. Next, cells were incubated in fresh growth medium with or without NR (up to 24 h) or harvested immediately (0 h). The NAD<sup>+</sup> levels were measured via enzymatic cycling assay, normalized to the total protein level measured by BCA, and expressed as fold change of “Control” at 0 h (n=2-3). **D:** Formation of DNA strand breaks was measured via fluorimetric detection of alkaline DNA unwinding (FADU) assay (n=3). **E:** ATP levels were measured via Cellular ATP Kit HTS and normalized to the total protein measured by BCA (n=3-4). Results were expressed as mean +SEM and analyzed by two-way ANOVA with Tukey’s multiple comparisons test. \*P<0.05, \*\*\* P<0.001.

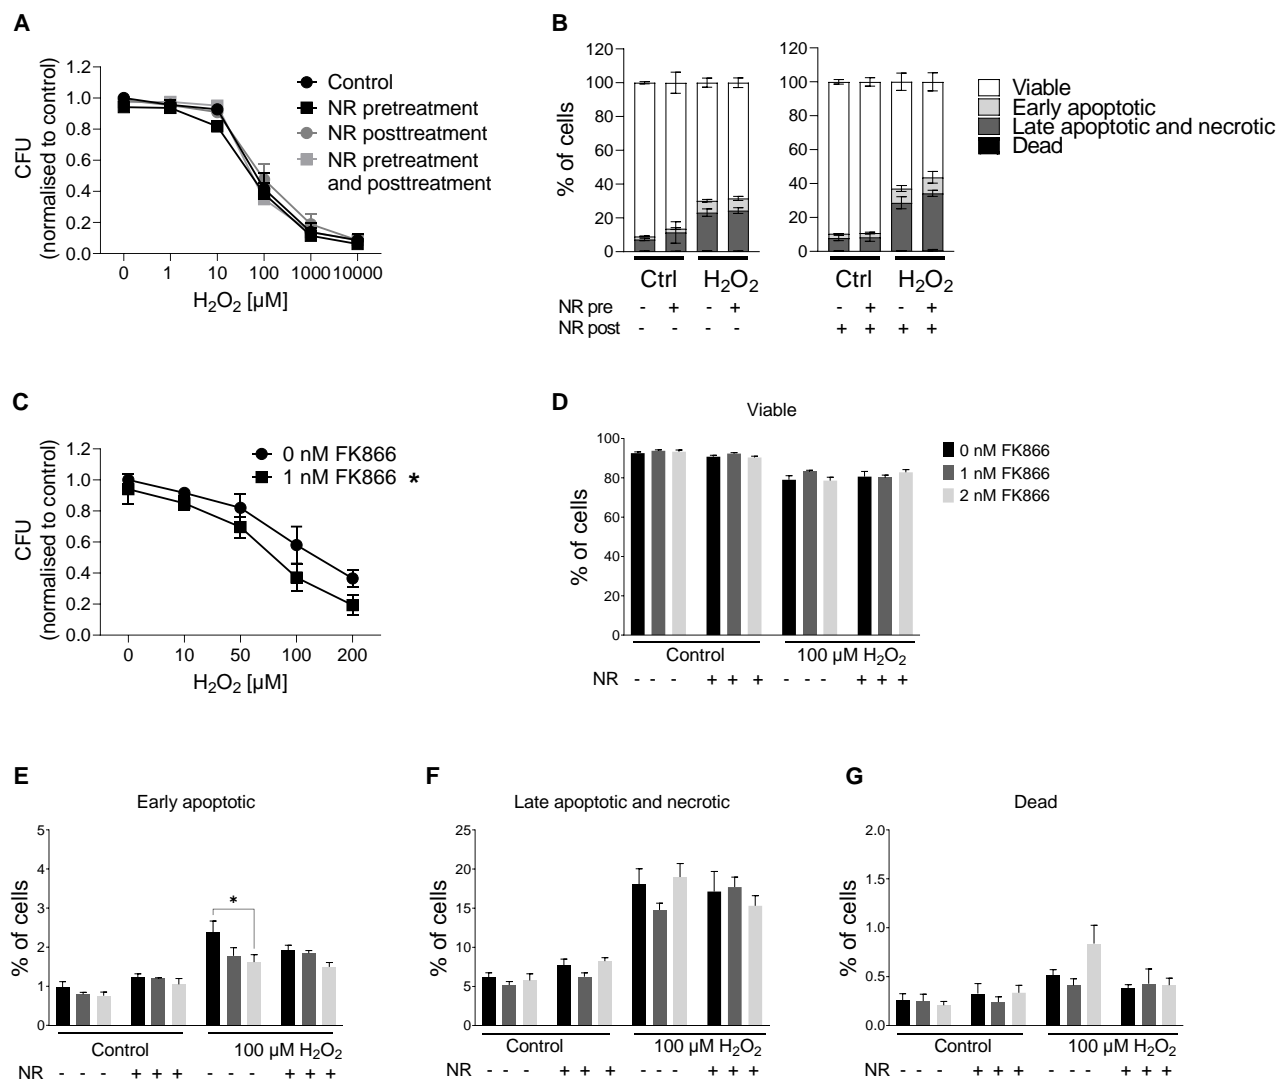

**Figure S5: Effects of NR on H<sub>2</sub>O<sub>2</sub> (geno)toxicity.** HaCaT cells were supplemented with 100 μM NR for 3 h and further treated with H<sub>2</sub>O<sub>2</sub> for 10 min. **A:** After treatment, cells were reseeded 1,000 cells per well in technical triplicates and incubated in fresh growth medium ±NR for 7 days. Then colonies were stained and counted. For each experiment, an average from technical replicates of the colony-forming unit (CFU) was calculated and normalized to “Control” (0 μM H<sub>2</sub>O<sub>2</sub>) (n=3). **B:** After treatment cells were incubated in fresh growth medium with or without NR for 24 h and cell death was analyzed via flow cytometry as described in Materials and methods (n=6). **C:** Cells were treated and analyzed like in (A), additionally FK866 was added to the culture, as described in Materials and methods (n=3). **D-G:** Cells were treated and analyzed via FACS like in (B), additionally FK866 was added to the culture, as described in Materials and methods (n=3-4). Results were expressed as mean ±SEM and analyzed by two-way ANOVA with Tukey's multiple comparisons test. \*P<0.05.

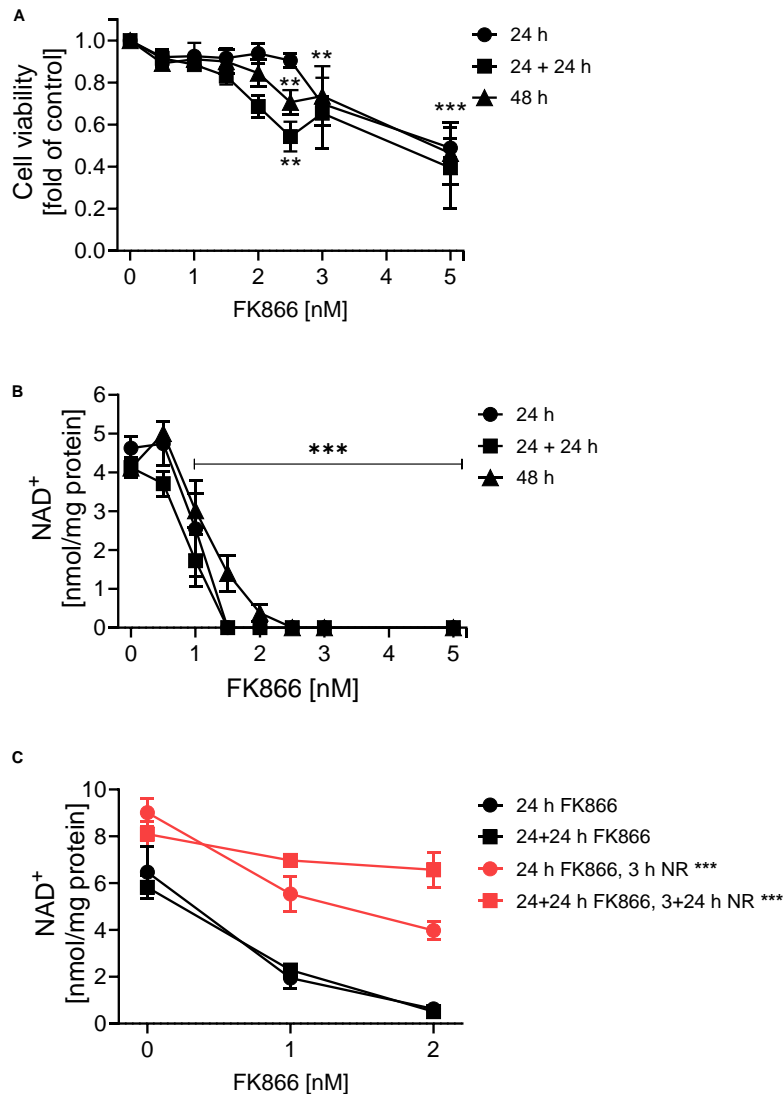

**Figure S6: The effects of FK866 on HaCaT cells.** HaCaT cells were treated with FK866 in 0.5% DMSO (0 nM FK866) in growth medium for 24 h or 48 h, additionally, the repeated exposure treatment (24+24 h) was applied, where fresh growth medium with FK866 was replaced after 24 h and cells were incubated for additional 24 h. **A:** Cell viability was measured via alamarBlue assay and results were normalized to “0 nM” (n=3). **B:** Cellular NAD<sup>+</sup> levels were measured via enzymatic cycling assay and normalized to the total protein level measured by BCA (n=3). **C:** HaCaT cells were treated with FK866 for 24 h and 24 + 24 h as in (A), additionally 100  $\mu$ M NR was applied either 3 h before cell harvesting during 24 h FK866 exposure, or with the new growth medium (3+24 h) for 24 + 24 h FK866 exposure. Cellular NAD<sup>+</sup> levels were measured via enzymatic cycling assay and normalized to the total protein level measured by BCA (n=3). Results were expressed as mean  $\pm$  SEM and analyzed by two-way ANOVA with Tukey’s multiple comparisons test. \*\* P<0.01, \*\*\* P<0.001.



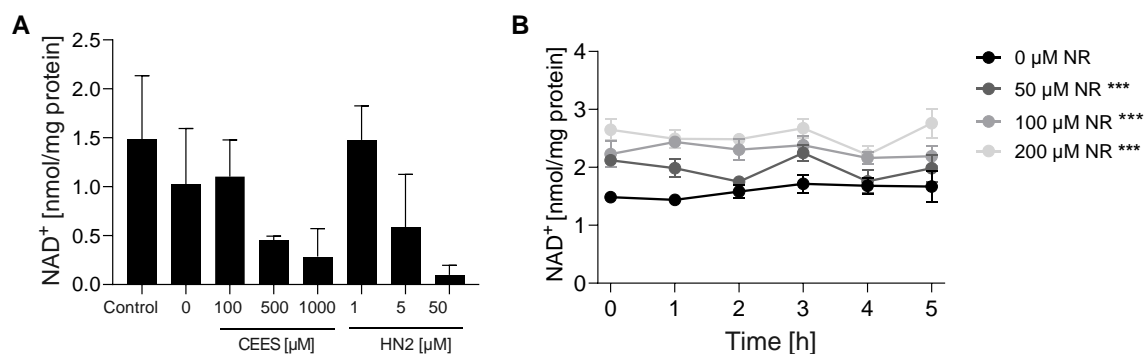

**Figure S7: NAD<sup>+</sup> levels upon mustards and NR treatments in THP-1 cells.** **A:** THP-1 cells were exposed to CEES or HN2 in growth medium (“Control”) for 30 min; “0” refers to solvent control. Next, cells were washed and incubated with fresh growth medium for 24 h, when cells were harvested for NAD<sup>+</sup> extraction (n=2). **B:** THP-1 cells were exposed to NR for 4 h, then the growth medium was replaced with fresh medium without NR, and cells were harvested up to 5 h later and cellular NAD<sup>+</sup> was extracted (n=4). The NAD<sup>+</sup> levels were measured via enzymatic cycling assay and normalized to the total protein level measured via BCA. The results were expressed as mean  $\pm$ SEM and analyzed by two-way ANOVA with Tukey’s multiple comparisons test. \*\*\* P<0.001.
